# Supplementary material
Source: HighWire-hosted journal article supplement (https://le.uwpress.org/highwire/filestream/3118/field_highwire_adjunct_files/0/LE-99-2-Isenhardt-appA.pdf)
Supplement: LE-99-2-Isenhardt-appA.pdf [file LE-99-2-Isenhardt-appA.pdf]

## Appendix A: Descriptive statistics

**Table A1:** Land transaction Saxony-Anhalt and market share of LGSA and BVVG auctions, 2007–2018

| Year | Number of Transaction* | Average soil quality* (index) | Sold agricultural land* (ha) | Share LGSA** (%) | Share BVVG** (%) |
|------|------------------------|-------------------------------|------------------------------|------------------|------------------|
| 2007 | 2,436                  | 59                            | 9,153                        | 5.09             | 10.98            |
| 2008 | 3,380                  | 61                            | 13,706                       | 5.07             | 4.54             |
| 2009 | 3,371                  | 60                            | 13,487                       | 6.89             | 9.72             |
| 2010 | 2,958                  | 59                            | 11,440                       | 3.65             | 7.60             |
| 2011 | 3,125                  | 61                            | 11,279                       | 3.99             | 10.40            |
| 2012 | 3,167                  | 60                            | 13,049                       | 7.03             | 7.21             |
| 2013 | 2,954                  | 63                            | 10,024                       | 0.89             | 16.78            |
| 2014 | 3,488                  | 59                            | 12,289                       | 8.14             | 10.88            |
| 2015 | 3,537                  | 61                            | 13,110                       | 5.34             | 10.20            |
| 2016 | 3,252                  | 58                            | 11,043                       | 6.11             | 5.31             |
| 2017 | 3,418                  | 58                            | 11,426                       | 6.57             | 11.09            |
| 2018 | 3,190                  | 58                            | 11,789                       | 2.12             | 7.11             |

Source: \* Total sales published by StaLa (2021). \*\*Share of public sellers at sold agricultural land obtained from data provided by LGSA and BVVG.

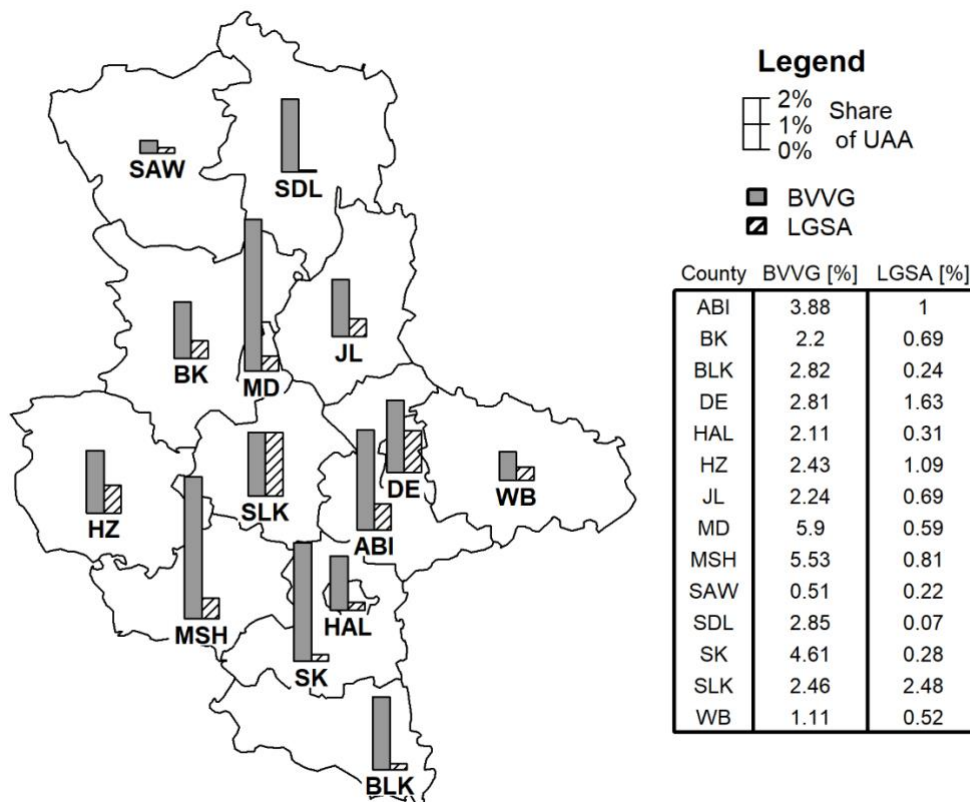

**Figure A1:** Turnover of the utilized agricultural area by LGSA and BVVG in the respective county  
 Source: Utilized agricultural area in counties of Saxony-Anhalt by StaLa (2021), Transaction volume obtained from all observations (2003-2018) provided by LGSA and BVVG.

**Table A2:** Right holder purchases by number of participants

|                                | <i>Number of participants</i> |             |             |             |             |            |
|--------------------------------|-------------------------------|-------------|-------------|-------------|-------------|------------|
|                                | #2                            | #3          | #4          | #5          | #6-8        | #9+        |
| Observations                   | 114                           | 201         | 199         | 152         | 184         | 76         |
| ...of which right hold has won | 94 (82.5%)                    | 149 (74.1%) | 149 (74.9%) | 104 (68.4%) | 111 (60.3%) | 45 (59.2%) |
| ...by exercising RFR           | 57 (60.6%)                    | 108 (72.5%) | 132 (88.6%) | 99 (95.2%)  | 107 (96.4%) | 45 (100%)  |
| ...or won by own bid           | 37 (39.4%)                    | 41 (27.5%)  | 17 (11.4%)  | 5 (4.8%)    | 4 (3.6%)    | 0 (0%)     |

**Table A3:** Descriptive of LGSA grouped by right holder behavior

|                                   | Mean  | Med.  | SD    | Q01   | Q99    |
|-----------------------------------|-------|-------|-------|-------|--------|
| <i>LGSA: exercised RFR (548)</i>  |       |       |       |       |        |
| Lot size (ha)                     | 7.52  | 8.67  | 3.31  | 0.12  | 14.7   |
| Soil quality (index)              | 67.68 | 71.00 | 21.19 | 26.30 | 100.00 |
| Share of arable land (%)          | 88.06 | 98.7  | 23.24 | 0.00  | 100.00 |
| Share of grassland (%)            | 9.08  | 0.00  | 21.66 | 0.00  | 100.00 |
| Share of other land (%)           | 2.87  | 0.00  | 6.37  | 0.00  | 33.26  |
| Number of bids (count)            | 4.59  | 4.00  | 2.27  | 1.00  | 12.00  |
| Winning bid (€/m <sup>2</sup> )   | 1.83  | 1.66  | 1.13  | 0.26  | 4.54   |
| <i>LGSA: won by own bid (104)</i> |       |       |       |       |        |
| Lot size (ha)                     | 7.42  | 8.42  | 3.04  | 0.44  | 12.72  |
| Soil quality (index)              | 53.78 | 50.5  | 18.39 | 20.59 | 92.37  |
| Share of arable land (%)          | 76.56 | 91.05 | 31.3  | 0.00  | 100.00 |
| Share of grassland (%)            | 18.79 | 1.45  | 31.15 | 0.00  | 100.00 |
| Share of other land (%)           | 4.63  | 1.00  | 8.38  | 0.00  | 36.66  |
| Number of bids (count)            | 3.03  | 3.00  | 1.07  | 2.00  | 6.00   |
| Winning bid (€/m <sup>2</sup> )   | 1.03  | 0.77  | 0.70  | 0.25  | 2.75   |
| <i>LGSA: rejected RFR (274)</i>   |       |       |       |       |        |
| Lot size (ha)                     | 7.08  | 7.95  | 3.07  | 0.39  | 11.71  |
| Soil quality (index)              | 71.44 | 79.00 | 21.13 | 21.47 | 99.00  |
| Share of arable land (%)          | 88.48 | 98.7  | 23.47 | 0.00  | 100.00 |
| Share of grassland (%)            | 8.57  | 0.00  | 21.91 | 0.00  | 100.00 |
| Share of other land (%)           | 2.95  | 0.00  | 6.66  | 0.00  | 34.05  |
| Number of bids (count)            | 4.93  | 4.00  | 2.69  | 1.00  | 13.00  |
| Winning bid (€/m <sup>2</sup> )   | 2.29  | 2.25  | 1.28  | 0.31  | 5.26   |

*Note:* Due to data privacy regulations, the table does not include information about the minima or maxima.

**Table A4:** Weighted difference in means of outcome measures

|            | <i>Outcome measures</i> |                                         |                    |                     |
|------------|-------------------------|-----------------------------------------|--------------------|---------------------|
|            | Bids ( <i>n</i> )       | Bids by non-right holders ( $n^{NRH}$ ) | Price ( <i>p</i> ) | Price ( $\log(p)$ ) |
| BVVG       | 5.151                   | 5.151                                   | 2.130              | 0.549               |
| LGSA       | 4.515                   | 3.781                                   | 1.878              | 0.377               |
| Difference | -0.636*** (0.169)       | -1.370*** (0.169)                       | -0.252*** (0.070)  | -0.172*** (0.040)   |
| Treated    | 926                     | 926                                     | 926                | 926                 |
| Control    | 590                     | 590                                     | 590                | 590                 |

Note: BVVG is weighted according to matching frequency. Heteroscedasticity-consistent standard errors in parentheses. Asterisks indicate \* $p < 0.1$ ; \*\* $p < 0.05$ ; \*\*\* $p < 0.01$  based on weighted t-test.

**Table A5:** Descriptive statistics of LGSA and matched BVVG sample

|                                 | <i>Seller: LGSA (926 transaction)</i> |       |       |       |        | <i>Seller: BVVG* (590 transaction)</i> |       |       |       |        |
|---------------------------------|---------------------------------------|-------|-------|-------|--------|----------------------------------------|-------|-------|-------|--------|
|                                 | Mean                                  | Med.  | SD    | Q01   | Q99    | Mean                                   | Med.  | SD    | Q01   | Q99    |
| <i>Lot characteristics</i>      |                                       |       |       |       |        |                                        |       |       |       |        |
| Lot size (ha)                   | 7.38                                  | 8.34  | 3.21  | 0.19  | 13.33  | 6.86                                   | 6.94  | 3.57  | 0.27  | 14.46  |
| Soil quality (index)            | 67.23                                 | 71.00 | 21.46 | 22.93 | 99.00  | 66.68                                  | 71.00 | 21.64 | 23.67 | 99.00  |
| Share of arable land (%)        | 86.89                                 | 98.2  | 24.59 | 0.00  | 100.00 | 87.25                                  | 99.1  | 25.65 | 0.00  | 100.00 |
| Share of grassland (%)          | 10.02                                 | 0.00  | 23.17 | 0.00  | 100.00 | 9.73                                   | 0.00  | 24.27 | 0.00  | 100.00 |
| Share of other land (%)         | 3.09                                  | 0.00  | 6.73  | 0.00  | 34.45  | 3.02                                   | 0.00  | 6.66  | 0.00  | 37.88  |
| <i>Auction characteristics</i>  |                                       |       |       |       |        |                                        |       |       |       |        |
| Number of bids                  | 4.52                                  | 4.00  | 2.36  | 1.00  | 12.75  | 5.15                                   | 4.00  | 3.21  | 2.00  | 17.75  |
| Bids by non-right holders       | 3.78                                  | 3.00  | 2.38  | 1.00  | 12.00  | 5.15                                   | 4.00  | 3.21  | 2.00  | 17.75  |
| Winning bid (€/m <sup>2</sup> ) | 1.88                                  | 1.73  | 1.19  | 0.27  | 4.70   | 2.13                                   | 1.89  | 1.24  | 0.3   | 5.12   |

Note: Due to data privacy regulations, the table does not include information about the minima or maxima. \*For BVVG, values are calculated by using weights.

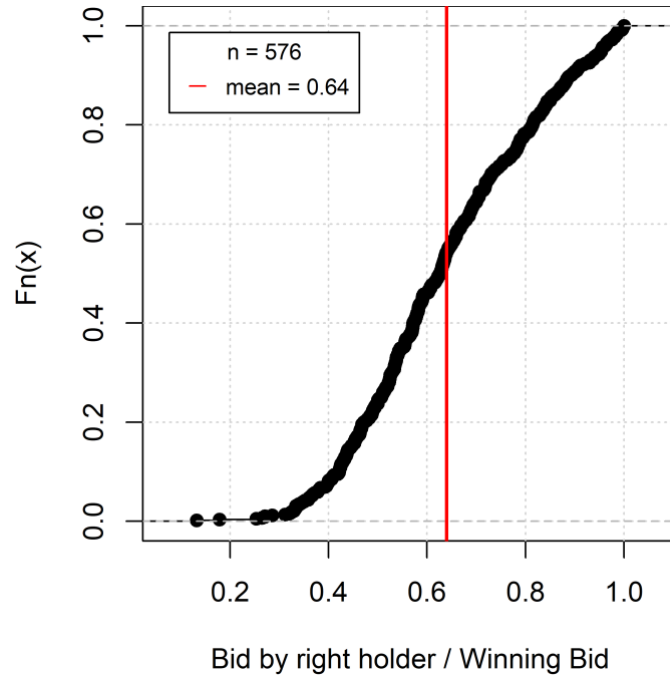

**Figure A2:** Ratio between bid by right holder and winning bid

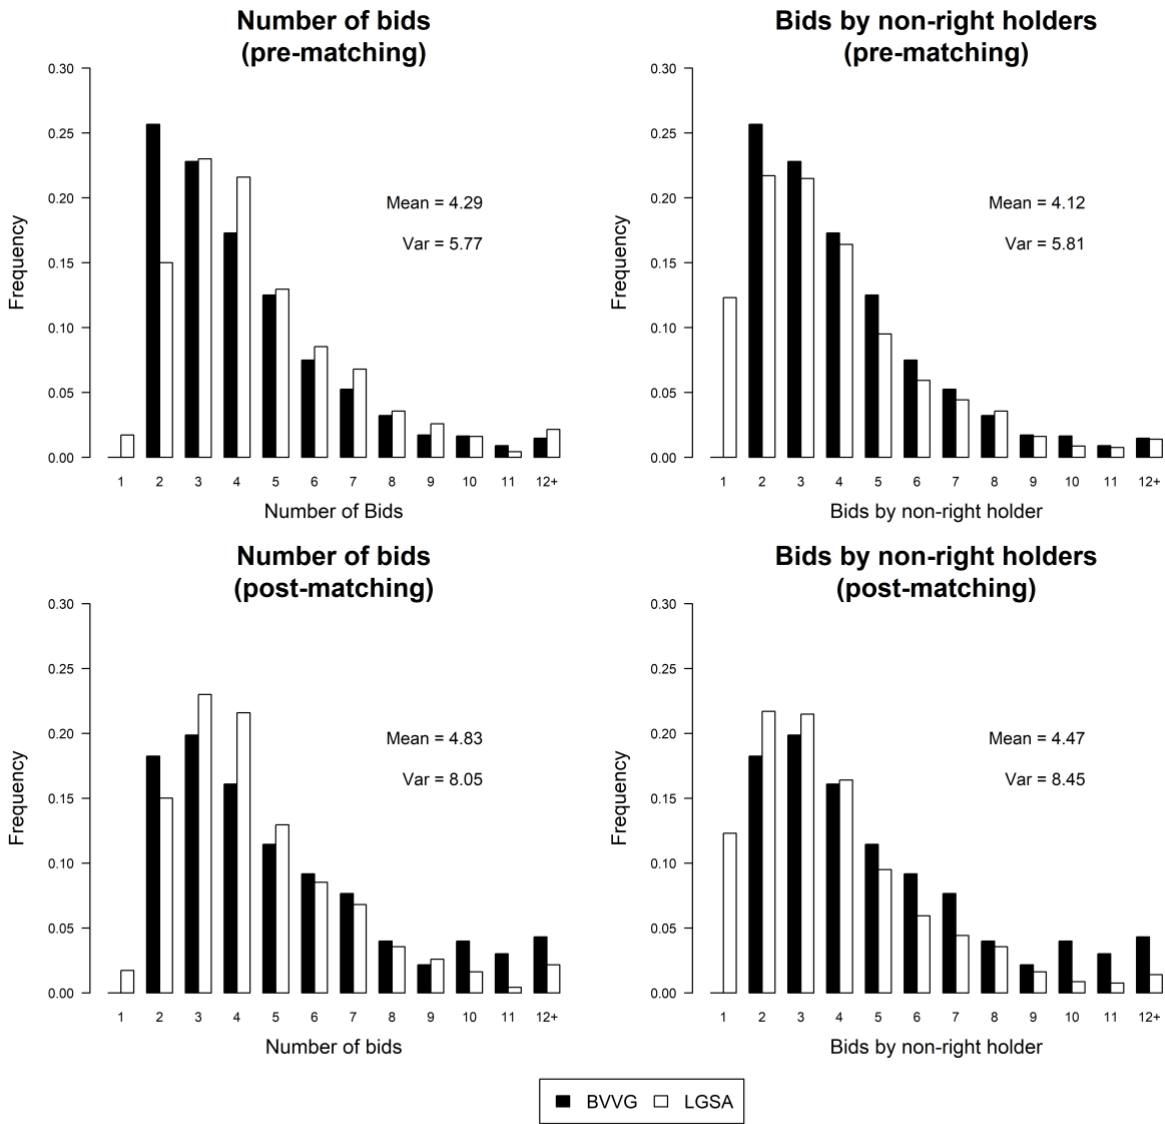

**Figure A3:** Frequency of competition measures by LGSA and BVVG

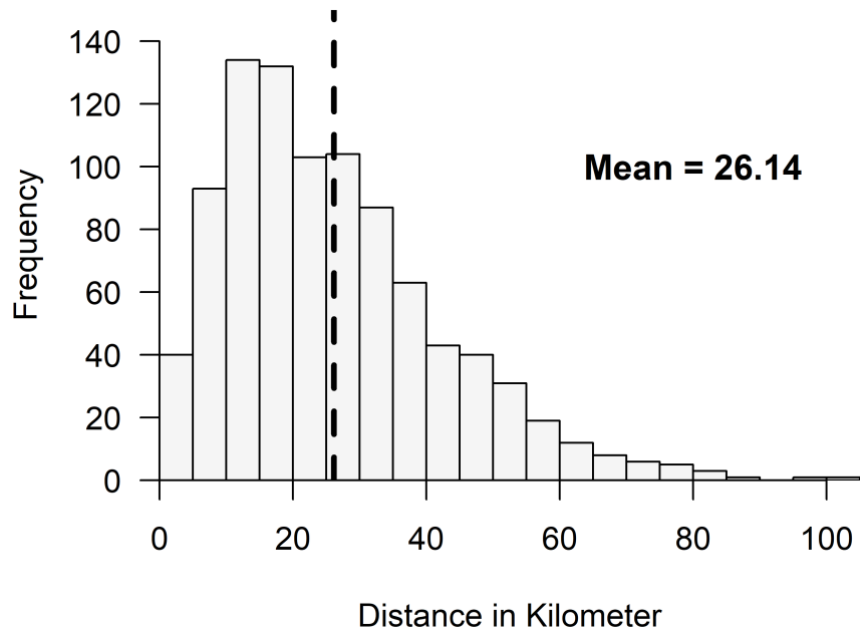

**Figure A4:** Distance between matched auction pairs
